# Supplementary material for: The synthesis of Mo(iv) arene complexes by the hydrogenation of Mo(iv) olefin complexes
Source: Royal Society of Chemistry journal article supplement (doi:10.1039/b007812n), 2001-01-01
Supplement: b007812n.doc [file b007812n.doc]

**Supplementary Information**

**Table 1** Tabulation of chemical shifts from 1H NMR spectra of **2a**–**h**. All spectra were obtained in C6D6. Aromatic resonances for **2f** and **2g** were obscured by excess uncoordinated arene.

| Arene complex | **2h** | **2a** | **2b** | **2c** | **2d** | **2e** | **2f** | **2g** |
| --- | --- | --- | --- | --- | --- | --- | --- | --- |
| Me3Si– | 0.36, s | 0.33, s | 0.35, s | 0.36, s | 0.37, s | 0.36, s | 0.35, | 0.35, s |
| Arene aliphatic groups | 0.54, t  1.53, q |  | 1.15, s | 1.10, s | 1.19, s | 1.21, s | 1.38, s | 1.88, t  2.43, t |
| Arene aromatic protons | 4.56, t  4.92, d  5.03, t | 4.80, s | 4.55, t  4.80, d  4.98, t | 4.56, m  5.29, m | 4.45, d  5.04, s  5.49, t | 4.85, s | 4.65, t  4.87, d  5.05, t  6.57, d | 4.61, t  4.92, d  5.04, t |
| Diamide aromatic protons | 6.71, m  6.91, m | 6.74, m  6.93, m | 6.71, m  6.94, m | 6.71, m  6.92, m | 6.72, m  6.94, m | 6.72, m  6.93, m | 6.77, m |  |
| Imido protons | 7.05, m | 6.88, m  7.05, d | 7.03, m | 6.86, m  7.05, m | 6.87, t  7.00, d  7.08, t | 6.86, t  7.05– 7.10, m |  |  |

1H NMR spectrum of **2h** [Mo(NPh)(6-ethylbenzene)(*o*-(Me3SiN)2C6H4)]

1H NMR spectrum of **2b** [Mo(NPh)(6-toluene)(*o*-(Me3SiN)2C6H4)]

1H NMR spectrum of **2c** [Mo(NPh)(6-*o*-xylene)(*o*-(Me3SiN)2C6H4)]

1H NMR spectrum of **2d** [Mo(NPh)(6-*m*-xylene)(*o*-(Me3SiN)2C6H4)]
